# Supplementary material for: DNA methylome-wide association study of genetic risk for depression implicates antigen processing and immune responses
Source: Genome Med. 2022 Mar 31;14:36. doi: 10.1186/s13073-022-01039-5 (PMC8969265; doi:10.1186/s13073-022-01039-5)
Supplement: Supplementary file 2 — Additional file 2: Table S10. Association statistics for the discovery MWAS and replication MWASs in the adult and adolescent samples. [file 13073_2022_1039_MOESM2_ESM.xlsx]

## Sheet: Sheet1
Additional file 2: Table S10
Association statistics for the discovery MWAS and replication MWASs in the adult and adolescent samples.
Beta = standardised regression coefficient; p.adj = Bonferroni-corrected p-value
All columns under the category 'annotation' were obtained from the annotation object from the 'IlluminaHumanMethylationEPICanno.ilm10b4.hg19' R package (version 3.13)
Column 'is.in_MDD_risk_region' indicates whether the CpG maps within 1Mb or within the R2>0.1 linkage disequilibrium block for any of the MDD genetic risk loci.
CpG	Discovery MWAS (GS, EPIC array)					Replication MWAS (LBC1921+LBC1936+ALSPAC adults, 450K array)				Replication MWAS (ALSPAC children, 450K array)				Annotation
	Beta	SE	p	Direction	p.adj	Beta	SE	P	p.adj	Beta	SE	p	p.adj	CHR	MAPINFO	ucsc_gene	Islands_Name	Relation_to_Island	is.in_MDD_risk_region
cg16893549	-0.0084	0.0013	4.441e-11	--	3.41746e-05	--	--	--	--	--	--	--	--	6	26364413	BTN3A2		OpenSea	Yes
cg04274288	-0.0172	0.0031	3.939e-08	--	0.0303116	-0.0185	0.0136	0.1732	1	-0.0226992	0.0283394	0.423626	1	6	27648004		chr6:27647793-27648005	Island	Yes
cg14159747	-0.0162	0.0024	2.25e-11	--	1.73143e-05	-0.0412	0.0151	0.006253	1	-0.0766744	0.031865	0.0165756	1	11	113255604		chr11:113258443-113258821	N_Shelf	Yes
cg22366279	-0.0165	0.0024	1.207e-11	--	9.28818e-06	-0.0615	0.0132	3.008e-06	1	-0.1292	0.0328631	9.96536e-05	1	6	28848900			OpenSea	No
cg12623302	-0.0147	0.0021	1.38e-12	--	1.06195e-06	-0.2177	0.0175	1.298e-35	5.84465e-30	-0.248679	0.0346644	3.61326e-12	1.6245e-06	6	28058802	ZSCAN12L1		OpenSea	Yes
cg16484858	0.0218	0.0036	1.918e-09	++	0.00147595	--	--	--	--	--	--	--	--	1	8484694	RERE; LOC102724552	chr1:8483389-8484339	S_Shore	Yes
cg00591421	-0.0113	0.002	2.98e-08	--	0.0229319	-0.0044	0.0097	0.6534	1	-0.0148774	0.021554	0.490448	1	10	106468736	SORCS3		OpenSea	Yes
cg09156207	-0.019	0.0033	6.89e-09	--	0.00530203	-0.2121	0.0214	4.286e-23	1.9299e-17	-0.186422	0.0346743	1.30139e-07	0.05851	6	28058724	ZSCAN12L1		OpenSea	Yes
cg26647111	-0.0154	0.0022	4.022e-12	--	3.09503e-06	-0.0056	0.014	0.6875	1	-0.0174751	0.0186029	0.348111	1	11	31128758			OpenSea	Yes
cg20858200	-0.0106	0.0019	1.343e-08	--	0.0103347	--	--	--	--	--	--	--	--	1	52316767	NRD1		OpenSea	Yes
cg06627827	-0.0169	0.0023	1.12e-13	--	8.61869e-08	--	--	--	--	--	--	--	--	1	72898668			OpenSea	Yes
cg08168669	-0.0123	0.0018	2.918e-12	--	2.24548e-06	--	--	--	--	--	--	--	--	6	26367580	BTN3A2		OpenSea	Yes
cg04317648	0.0112	0.0016	8.341e-12	++	6.41862e-06	--	--	--	--	--	--	--	--	1	8485376	LOC102724552; RERE	chr1:8483389-8484339	S_Shore	Yes
cg01864468	0.0248	0.004	7.668e-10	+?	0.000590073	--	--	--	--	0.102801	0.0424493	0.0158953	1	6	28863428		chr6:28863343-28863545	Island	No
cg06941483	0.016	0.0022	1.98e-13	++	1.52366e-07	-0.0078	0.0196	0.6889	1	0.129102	0.0354576	0.00030758	1	11	30874744			OpenSea	Yes
cg06608359	0.0158	0.0026	1.216e-09	++	0.000935744	0.0752	0.0113	2.471e-11	1.11264e-05	0.109273	0.0225868	1.88282e-06	0.846508	6	28831300		chr6:28831682-28832134	N_Shore	Yes
cg14004768	0.0198	0.0031	2.011e-10	++	0.000154752	--	--	--	--	--	--	--	--	1	8484703	RERE; LOC102724552	chr1:8483389-8484339	S_Shore	Yes
cg23275840	0.0091	0.0016	3.238e-08	++	0.0249173	0.0067	0.0072	0.3512	1	0.0272883	0.0174879	0.119462	1	4	47708675	CORIN	chr4:47708443-47708712	Island	Yes
cg25643361	-0.0145	0.0022	1.779e-11	--	1.36899e-05	--	--	--	--	--	--	--	--	6	26361389			OpenSea	No
cg19041857	0.0111	0.002	1.837e-08	++	0.0141362	0.0829	0.0162	3.02e-07	0.135985	0.119168	0.0369724	0.00137279	1	6	27730383			OpenSea	Yes
cg27045756	0.0116	0.0021	2.77e-08	++	0.0213159	0.1028	0.0156	4.172e-11	1.87857e-05	0.109077	0.0389815	0.00539051	1	6	28971967	ZNF311		OpenSea	No
cg14345882	-0.0176	0.0021	9.456e-17	--	7.27664e-11	-0.251	0.0154	1.681e-59	7.56922e-54	-0.268531	0.0341209	3.42602e-14	1.54032e-08	6	26364793	BTN3A2		OpenSea	Yes
cg09614754	-0.0126	0.0019	1.668e-11	--	1.28357e-05	--	--	--	--	--	--	--	--	6	26367571	BTN3A2		OpenSea	Yes
cg20788561	-0.0112	0.002	4.19e-08	--	0.0322431	-0.0411	0.0161	0.0106	1	-0.0700158	0.0270556	0.010013	1	18	77586855		chr18:77585913-77586856	Island	Yes
cg26200795	0.0178	0.0024	5.712e-14	++	4.39553e-08	--	--	--	--	--	--	--	--	18	52895482	TCF4		OpenSea	Yes
cg01354632	-0.0175	0.0025	3.506e-12	--	2.69796e-06	--	--	--	--	--	--	--	--	6	28058969	ZSCAN12P1		OpenSea	Yes
cg14261943	-0.0215	0.0038	1.08e-08	--	0.00831088	-0.07	0.0344	0.04157	1	-0.23503	0.058149	6.37292e-05	1	6	28972348	ZNF311		OpenSea	No
cg17162899	0.009	0.0017	6.345e-08	++	0.0488264	--	--	--	--	--	--	--	--	11	61456387	DAGLA		OpenSea	Yes
cg12963246	-0.0226	0.0038	2.101e-09	--	0.00161677	-0.1084	0.0138	4.253e-15	1.91505e-09	-0.139198	0.0276258	7.14005e-07	0.321013	6	28129442	ZNF389		OpenSea	Yes
cg16677399	0.0141	0.002	6.18e-13	++	4.75567e-07	0.2749	0.0224	1.096e-34	4.93508e-29	0.381082	0.0445516	2.64081e-16	1.1873e-10	6	28830902		chr6:28831682-28832134	N_Shore	Yes
cg19465883	0.0155	0.0024	2.28e-10	++	0.000175452	--	--	--	--	--	--	--	--	1	8484670	RERE; LOC102724552	chr1:8483389-8484339	S_Shore	Yes
cg17849569	-0.0183	0.0025	9.23e-14	--	7.10272e-08	-0.1631	0.0158	5.863e-25	2.64e-19	-0.201212	0.0351529	2.05847e-08	0.00925476	6	28058911	ZSCAN12L1		OpenSea	Yes
cg27271301	-0.0101	0.0017	5.703e-09	--	0.00438861	--	--	--	--	--	--	--	--	18	77583437		chr18:77585913-77586856	N_Shelf	Yes
cg20866694	0.0336	0.0051	3.52e-11	++	2.70873e-05	0.1572	0.0278	1.54e-08	0.00693433	0.266804	0.0509209	2.62169e-07	0.11787	6	27181670			OpenSea	Yes
cg02631126	-0.0203	0.0028	6.934e-13	--	5.33589e-07	-0.2098	0.0192	7.176e-28	3.23122e-22	-0.252085	0.0421346	4.90918e-09	0.00220714	6	28058918	ZSCAN12L1		OpenSea	Yes
cg16996682	0.0116	0.0021	2.106e-08	++	0.0162062	0.0031	0.0107	0.7705	1	0.000643529	0.0142393	0.963976	1	1	71830814			OpenSea	Yes
cg18105139	-0.0185	0.0028	5.897e-11	--	4.53789e-05	-0.172	0.0178	4.073e-22	1.83399e-16	-0.206999	0.0440116	3.54185e-06	1	6	28058856	ZSCAN12L1		OpenSea	Yes
cg07519229	-0.0119	0.002	1.634e-09	--	0.00125741	-0.0238	0.012	0.04717	1	0.0170056	0.0252882	0.501677	1	22	41486835		chr22:41487261-41489159	N_Shore	Yes
cg12914966	0.0185	0.0028	4.274e-11	++	3.28895e-05	0.2062	0.0185	7.235e-29	3.25778e-23	0.189015	0.026797	7.82909e-12	3.51992e-06	6	28830789		chr6:28831682-28832134	N_Shore	Yes
cg12896170	-0.009	0.0015	3.236e-09	--	0.00249019	-0.0397	0.0086	4.283e-06	1	-0.0316156	0.0168334	0.0610959	1	6	28890069	TRIM27	chr6:28890951-28892013	N_Shore	No
cg16949688	-0.0108	0.0018	2.435e-09	--	0.0018738	--	--	--	--	--	--	--	--	18	77578058			OpenSea	Yes
cg00903577	0.016	0.0023	2.004e-12	++	1.54213e-06	0.16	0.0133	2.07e-33	9.32082e-28	0.193953	0.0222271	7.42621e-17	3.33879e-11	6	28831109		chr6:28831682-28832134	N_Shore	Yes
cg10046620	-0.0139	0.0019	1.105e-12	--	8.50326e-07	-0.0444	0.0101	1.119e-05	1	-0.0537786	0.0179515	0.00290961	1	6	27775042	HIST1H2AI	chr6:27775329-27776258	N_Shore	Yes
cg10401017	-0.01	0.0014	2.299e-13	--	1.76914e-07	-0.0768	0.0111	5.267e-12	2.37163e-06	-0.0906148	0.0208388	1.74653e-05	1	6	28887586	TRIM27	chr6:28890951-28892013	N_Shelf	No
cg12740337	-0.0166	0.0021	9.721e-15	--	7.48056e-09	-0.1515	0.0124	3.277e-34	1.47557e-28	-0.191902	0.0255962	4.31211e-13	1.9387e-07	6	28058973	ZSCAN12L1		OpenSea	Yes
cg26272214	0.0165	0.0028	4.85e-09	++	0.0037322	0.0024	0.0167	0.8874	1	0.0707337	0.0392061	0.0719673	1	1	177225888	FAM5B		OpenSea	Yes
cg19624444	0.018	0.0031	4.681e-09	++	0.00360215	0.0569	0.0168	0.0007144	1	-0.0337023	0.0396023	0.395273	1	7	2048497	MAD1L1	chr7:2044583-2044788	S_Shelf	Yes
cg21204522	0.0183	0.0032	1.327e-08	++	0.0102116	0.0829	0.0221	0.0001811	1	0.0638143	0.0378863	0.0928995	1	6	27730016			OpenSea	Yes
cg15418890	0.0155	0.0027	1.001e-08	++	0.00770296	--	--	--	--	--	--	--	--	6	26593232		chr6:26596046-26596321	N_Shelf	Yes
cg26587870	0.0259	0.0035	8.052e-14	++	6.19622e-08	0.1189	0.0203	4.776e-09	0.00215054	0.151775	0.0398276	0.000160549	1	6	27730563			OpenSea	Yes
cg19592336	-0.0255	0.0043	3.235e-09	--	0.00248942	-0.0866	0.0164	1.367e-07	0.0615534	-0.0707004	0.0219523	0.00138466	1	6	28129416	ZNF389		OpenSea	Yes
cg04861640	-0.0165	0.003	3.933e-08	--	0.0302655	-0.0254	0.0167	0.127	1	-0.0811193	0.0381426	0.0340597	1	6	28234605	ZNF187	chr6:28234842-28235124	N_Shore	Yes
cg26335602	-0.0181	0.0033	3.796e-08	--	0.0292112	-0.1253	0.0186	1.778e-11	8.006e-06	-0.198208	0.0377778	2.52917e-07	0.11371	6	28129616	ZNF389		OpenSea	Yes
cg06276712	-0.011	0.0016	2.285e-12	--	1.75837e-06	--	--	--	--	--	--	--	--	7	12107011			OpenSea	Yes
cg20933634	-0.0111	0.0019	5.452e-09	--	0.00419546	-0.0384	0.0092	3.306e-05	1	-0.0539247	0.0216796	0.0132805	1	6	27740509			OpenSea	Yes
cg08798685	0.0152	0.0025	7.444e-10	++	0.000572835	0.0804	0.021	0.000125	1	0.0469511	0.0431337	0.277036	1	6	27730294			OpenSea	Yes
cg23281280	-0.0215	0.0035	1.426e-09	--	0.00109734	-0.1097	0.0164	1.999e-11	9.00112e-06	-0.146164	0.0294075	9.97162e-07	0.448319	6	28129359	ZNF389		OpenSea	Yes
cg06952873	-0.0173	0.0025	6.174e-12	--	4.75105e-06	-0.1907	0.0174	6.237e-28	2.8084e-22	-0.248582	0.0333763	5.99362e-13	2.6947e-07	6	28059208	ZSCAN12L1		OpenSea	Yes
cg15377409	0.0154	0.0022	5.335e-12	++	4.10542e-06	--	--	--	--	--	--	--	--	6	27730551	LOC100131289		OpenSea	Yes
cg27179866	-0.0155	0.0026	3.057e-09	--	0.00235244	-0.0995	0.016	4.875e-10	0.000219512	-0.0613988	0.033395	0.0667286	1	6	27740120			OpenSea	Yes
cg05216056	-0.009	0.0014	6.442e-11	--	4.95729e-05	-0.0445	0.0081	4.638e-08	0.020884	-0.047352	0.0188619	0.0124552	1	6	28887836	TRIM27	chr6:28890951-28892013	N_Shelf	No
cg13025000	-0.0176	0.003	2.749e-09	--	0.00211543	--	--	--	--	--	--	--	--	6	28129656	ZNF192P1		OpenSea	Yes
cg05328885	0.0387	0.004	3.135e-22	++	2.41246e-16	--	--	--	--	--	--	--	--	11	30943623	DCDC5		OpenSea	Yes
cg06552810	-0.0182	0.0027	3.764e-11	--	2.8965e-05	-0.0218	0.0172	0.2032	1	-0.0179771	0.0340411	0.597726	1	11	31128660			OpenSea	Yes
cg18844029	-0.0172	0.0023	4.329e-14	--	3.33128e-08	-0.1274	0.0225	1.4e-08	0.00630393	-0.134934	0.0340958	8.97597e-05	1	6	28885017	TRIM27		OpenSea	No
cg09256413	-0.0125	0.0016	3.144e-15	--	2.41939e-09	-0.0196	0.0086	0.02176	1	-0.0218969	0.0152215	0.151069	1	1	72566690	NEGR1		OpenSea	Yes
cg05590274	0.0152	0.0019	2.442e-16	++	1.87918e-10	0.0189	0.0109	0.08289	1	0.038352	0.025537	0.133939	1	11	113262625	ANKK1	chr11:113258443-113258821	S_Shelf	Yes
cg27543291	-0.017	0.0025	6.101e-12	--	4.69488e-06	--	--	--	--	--	--	--	--	6	26367644	BTN3A2		OpenSea	Yes
cg11517269	-0.0152	0.0022	7.534e-12	--	5.79761e-06	-0.1928	0.0164	5.637e-32	2.53823e-26	-0.197754	0.0309906	4.91849e-10	0.000221133	6	28058789	ZSCAN12L1		OpenSea	Yes
cg25108566	-0.0127	0.0022	3.712e-09	--	0.00285648	-0.0454	0.008	1.604e-08	0.00722251	-0.0361361	0.0129829	0.00563773	1	6	27775657	HIST1H2AI; HIST1H2BL	chr6:27775329-27776258	Island	Yes
cg14844989	-0.0155	0.0026	2.342e-09	--	0.00180223	-0.0148	0.0171	0.3851	1	-0.0184548	0.0265527	0.487446	1	11	31128820			OpenSea	Yes
